# Supplementary material for: Improved electrochemical performance of spinel LiMn1.5Ni0.5O4 through MgF2 nano-coating
Source: Royal Society of Chemistry journal article supplement (doi:10.1039/c5nr03564c), 2015-01-01
Supplement: c5nr03564c1.pdf [file c5nr03564c1.pdf]

## Supporting Information

### Improved Electrochemical Performance of Spinel $\text{LiMn}_{1.5}\text{Ni}_{0.5}\text{O}_4$ through $\text{MgF}_2$ Nano-coating

Qing Wu,<sup>† [a]</sup> Xiaoping Zhang,<sup>† [a]</sup> Shuwei Sun,<sup>[a]</sup> Ning Wan,<sup>[a]</sup> Du Pan,<sup>[a]</sup>

Ying Bai<sup>\*[a] [b]</sup>, Huiyuan Zhu<sup>[b]</sup>, Yong-Sheng Hu<sup>[c]</sup>, Sheng Dai<sup>[b]</sup>

[a] Key Laboratory of Photovoltaic Materials of Henan Province and School of  
Physics & Electronics, Henan University, Kaifeng 475004, PR China.

[b] Chemical Sciences Division, Oak Ridge National Laboratory, Oak Ridge, TN  
37831, USA.

[c] Institute of Physics, Chinese Academy of Sciences, Beijing 100190, PR China.

<sup>†</sup> These authors contributed equally to this work.

**\*Corresponding author.**

E-mail addresses: [ybai@henu.edu.cn](mailto:ybai@henu.edu.cn) (Ying Bai).

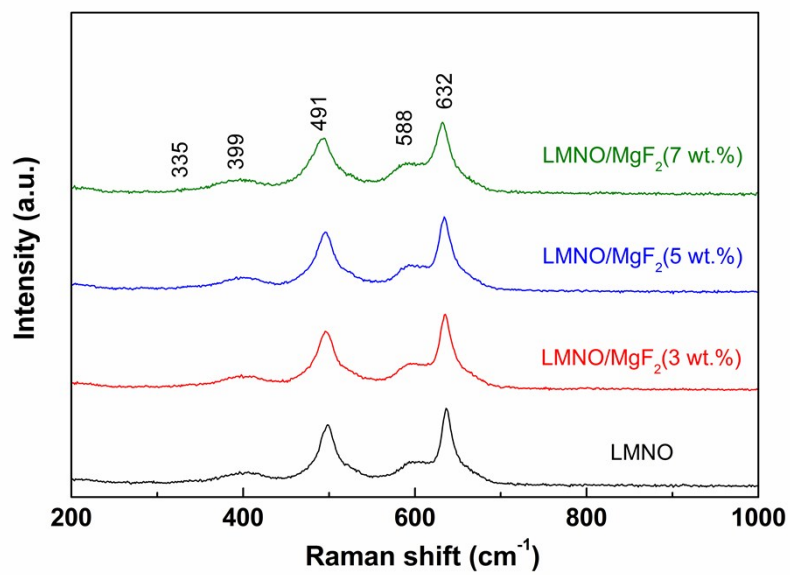

**Fig. S1.** Raman spectra of the pristine and MgF<sub>2</sub>-coated LMNO.

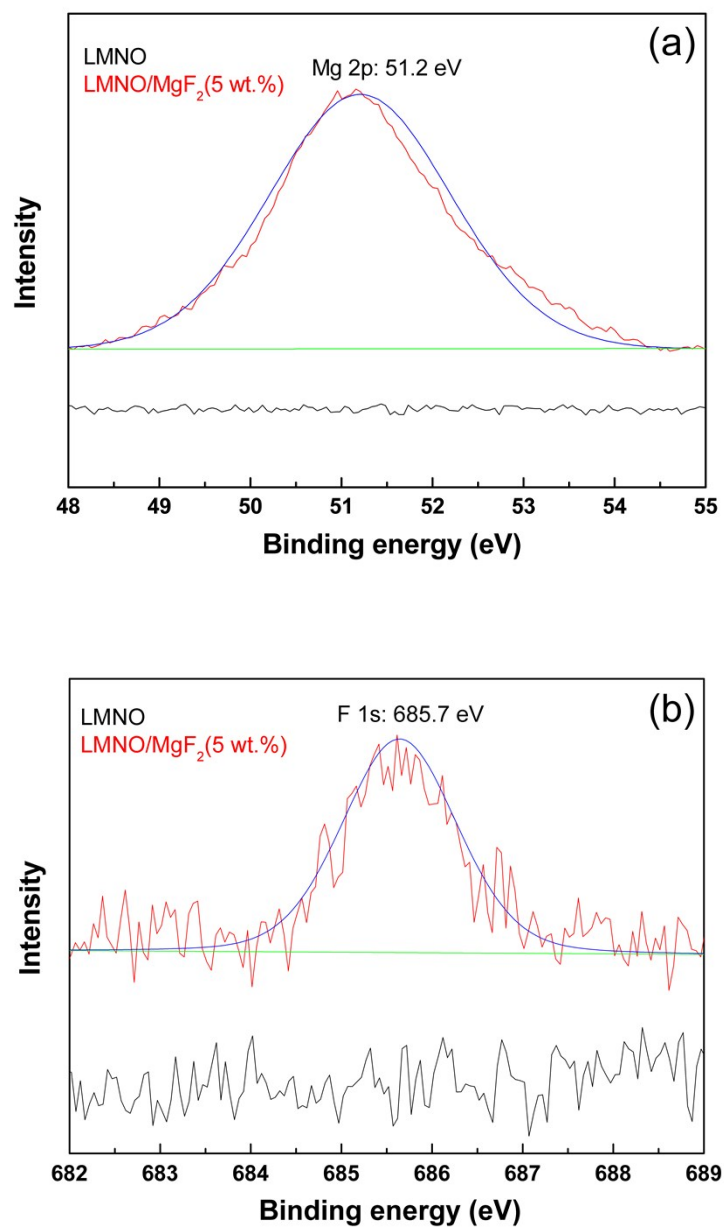

**Fig. S2.** XPS spectra of pristine and 5 wt.% MgF<sub>2</sub>-coated LMNO. (a) Mg 2p; (b) F 1s.

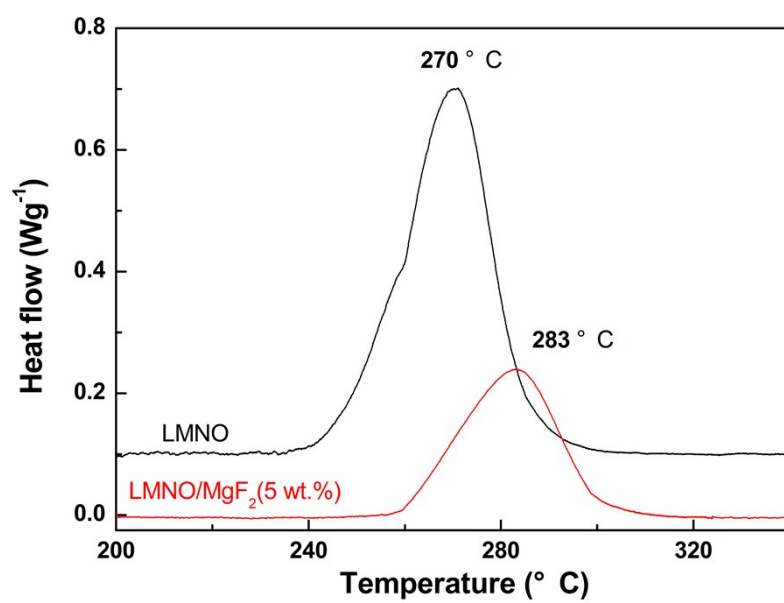

**Fig. S3.** DSC traces of the pristine and 5 wt.% MgF<sub>2</sub>-coated LMNO electrodes at charged state of 4.9 V.
